# Supplementary material
Source: Atypon-hosted journal article supplement (doi:10.1287/ijoc.2025.1169)

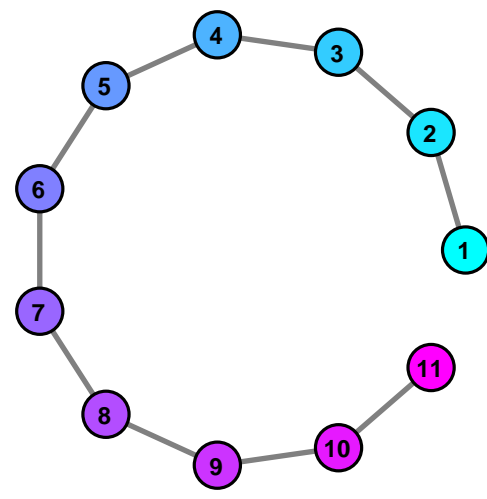

Path graph

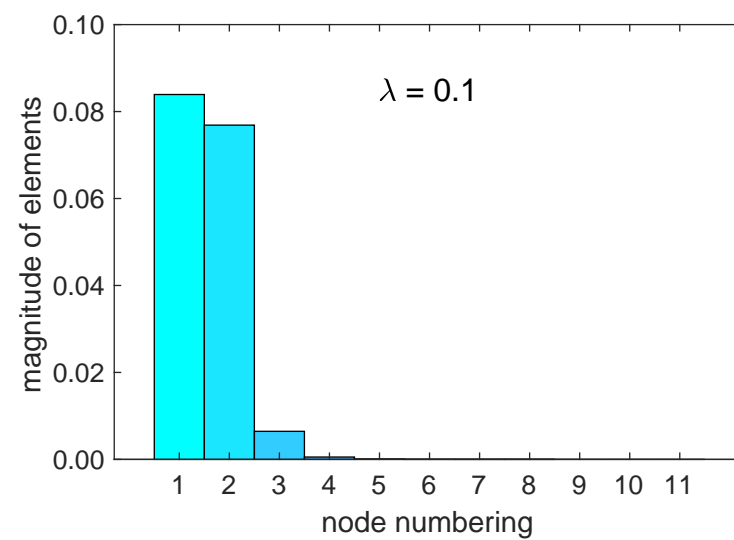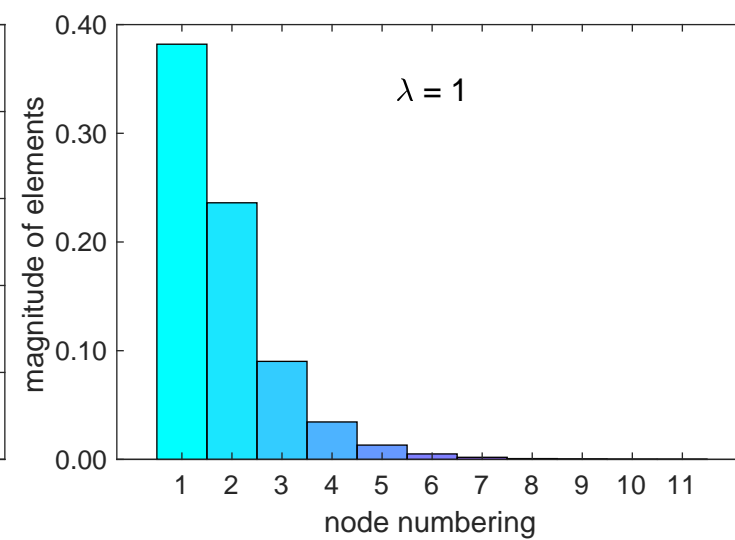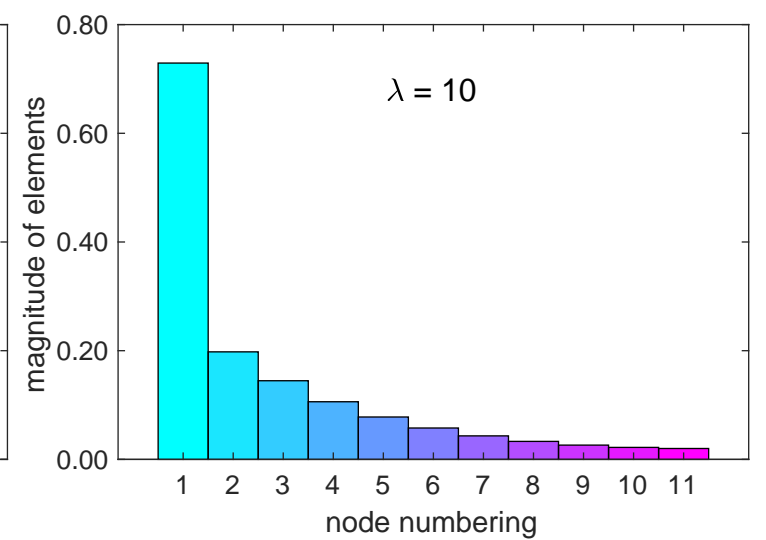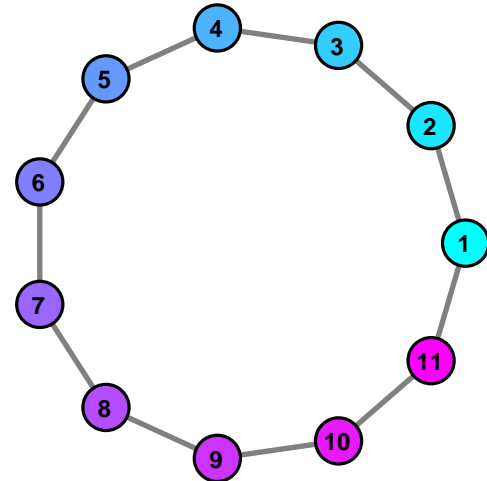

Cycle graph

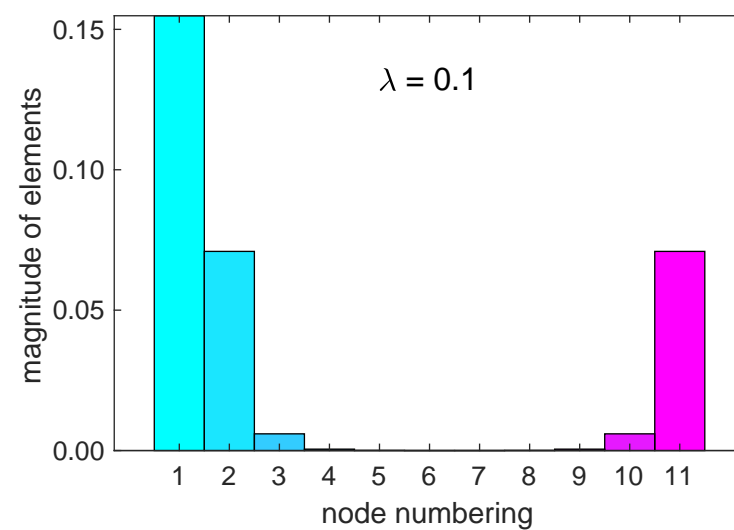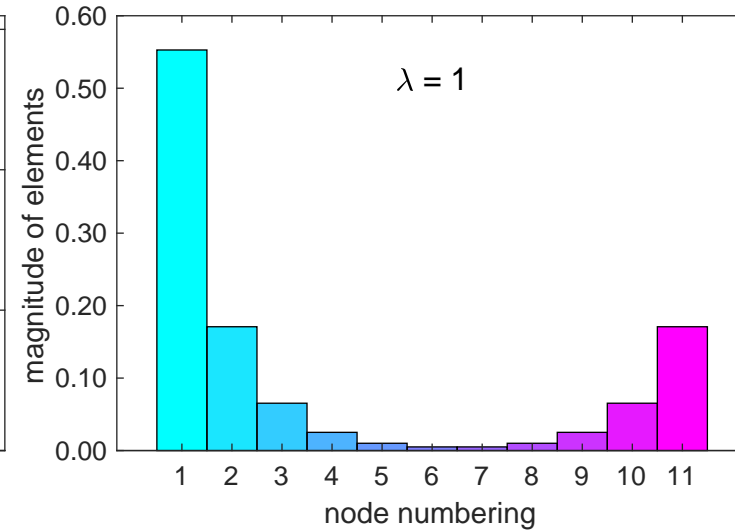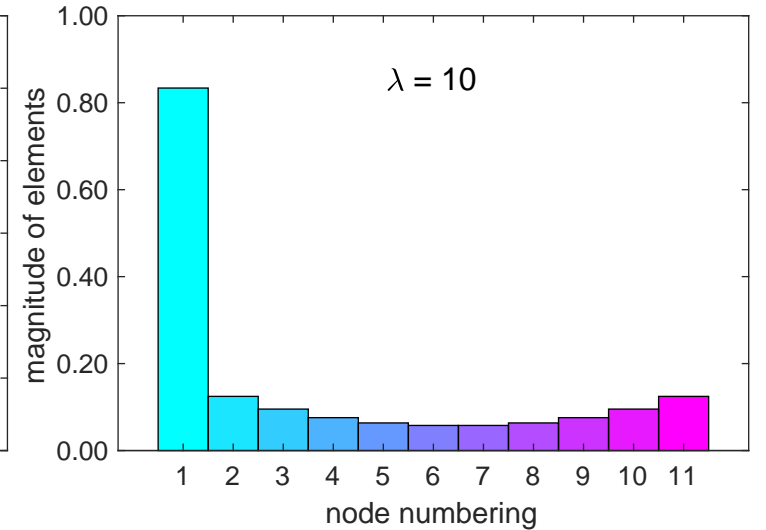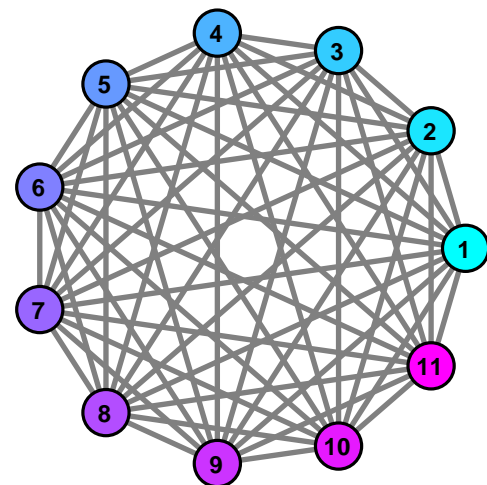

Complete graph

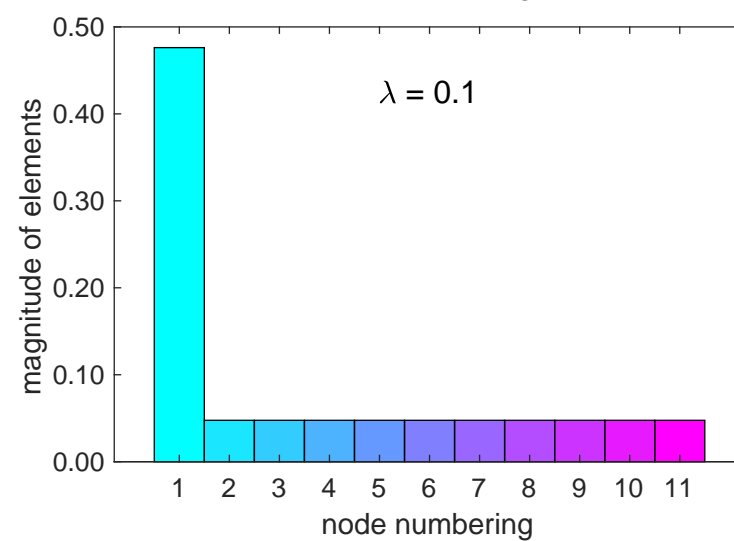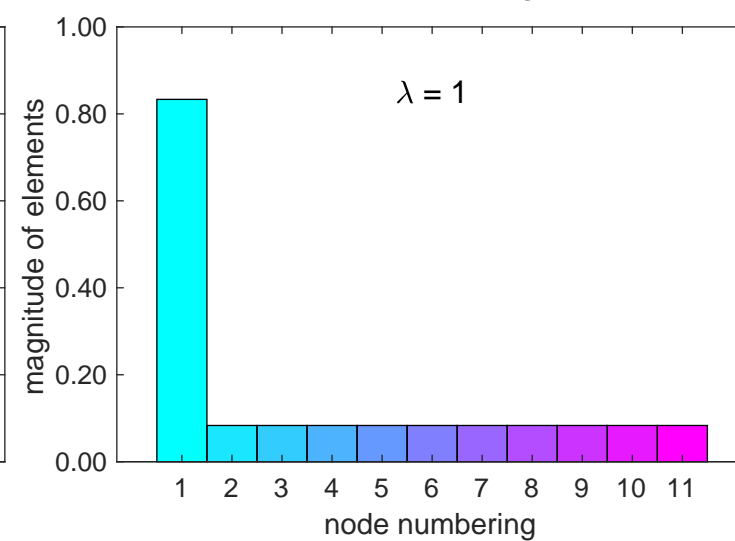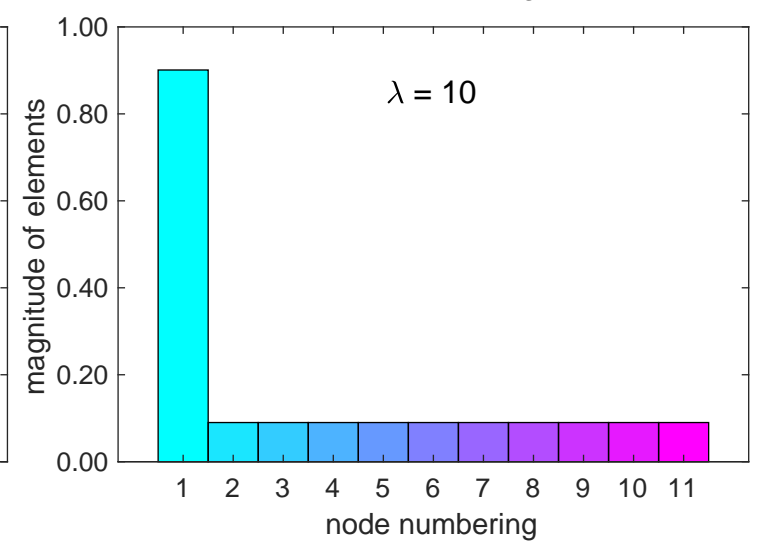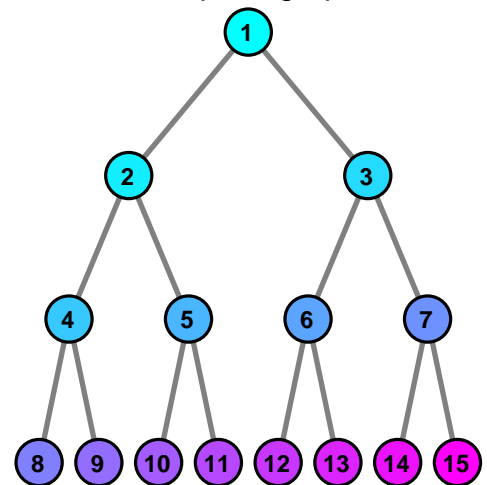

Tree graph

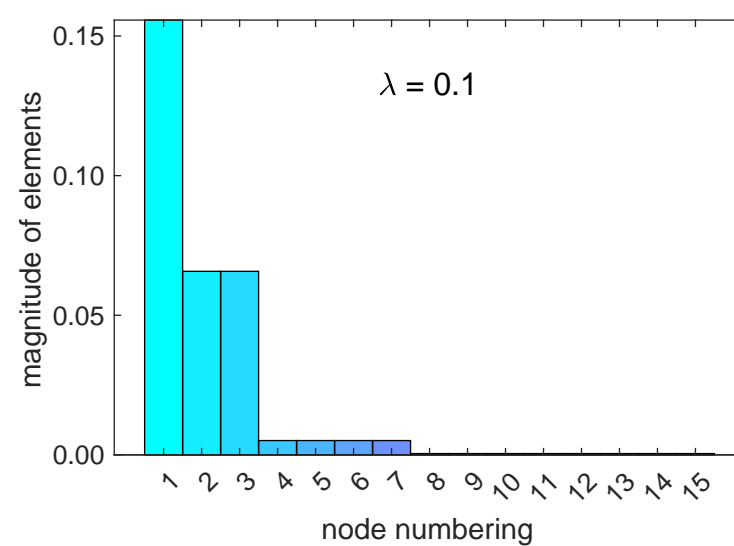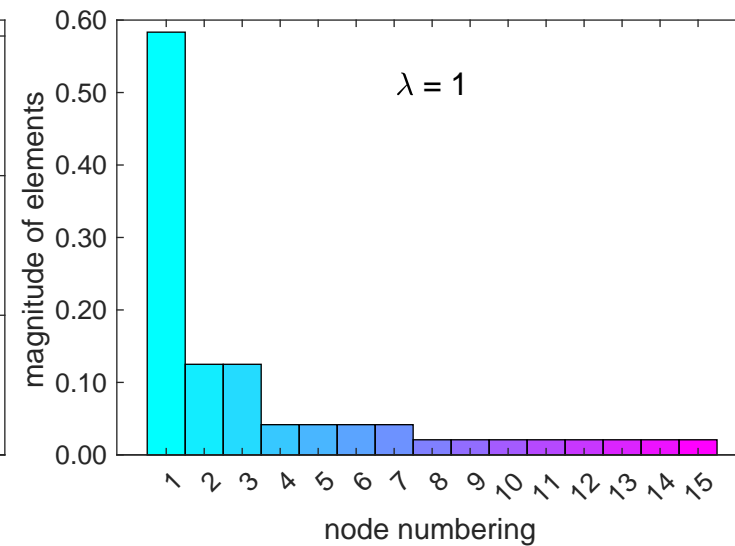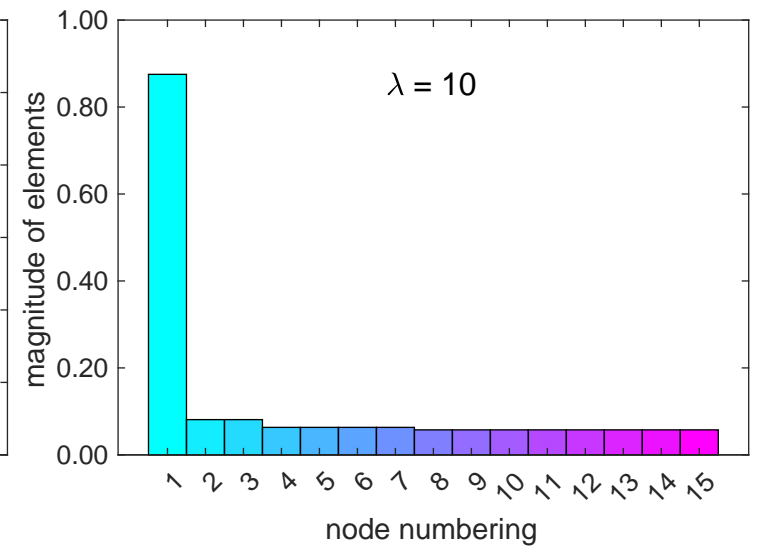

Supplement: ijoc.2025.1169.cd.zip [file fig1.pdf › 2025.1169-main/results/fig1.pdf]

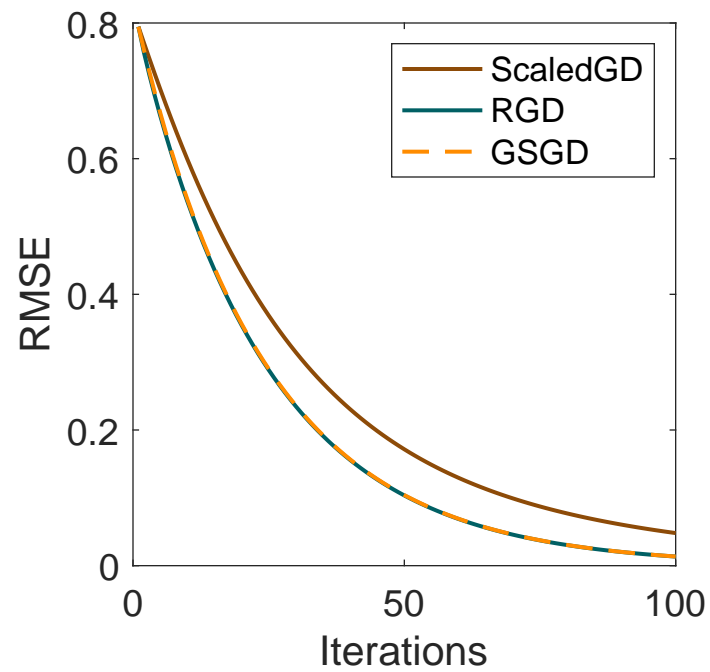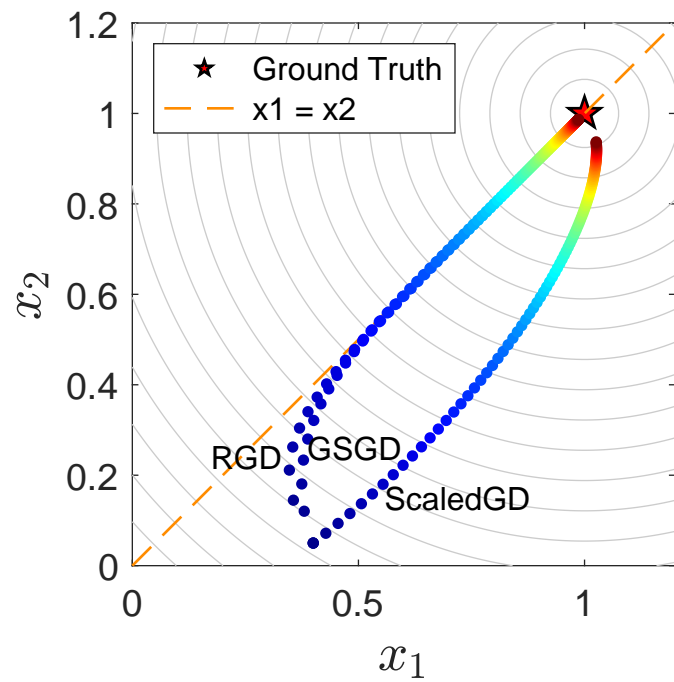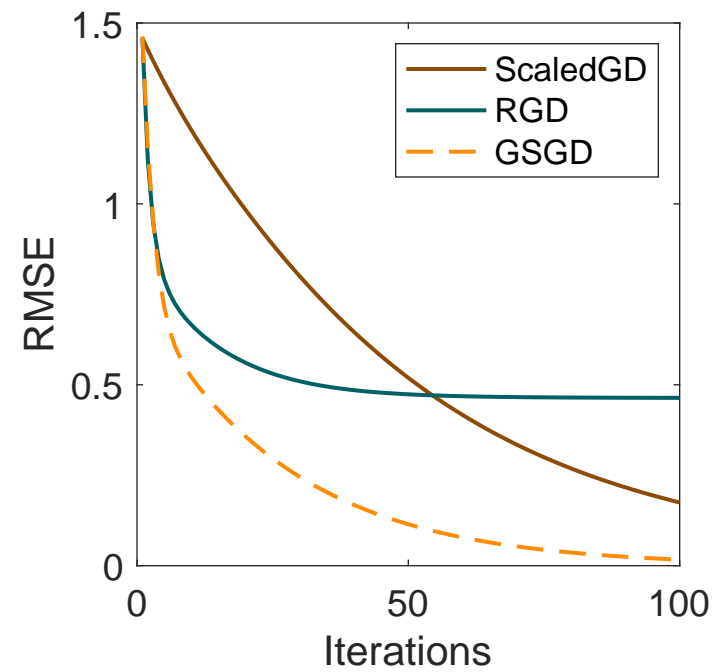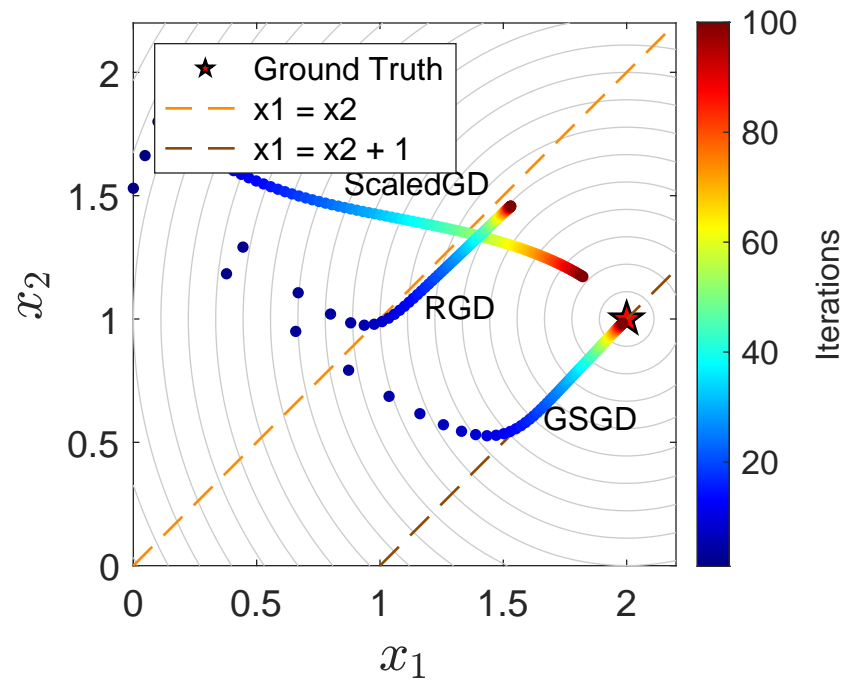

Supplement: ijoc.2025.1169.cd.zip [file fig2.pdf › 2025.1169-main/results/fig2.pdf]

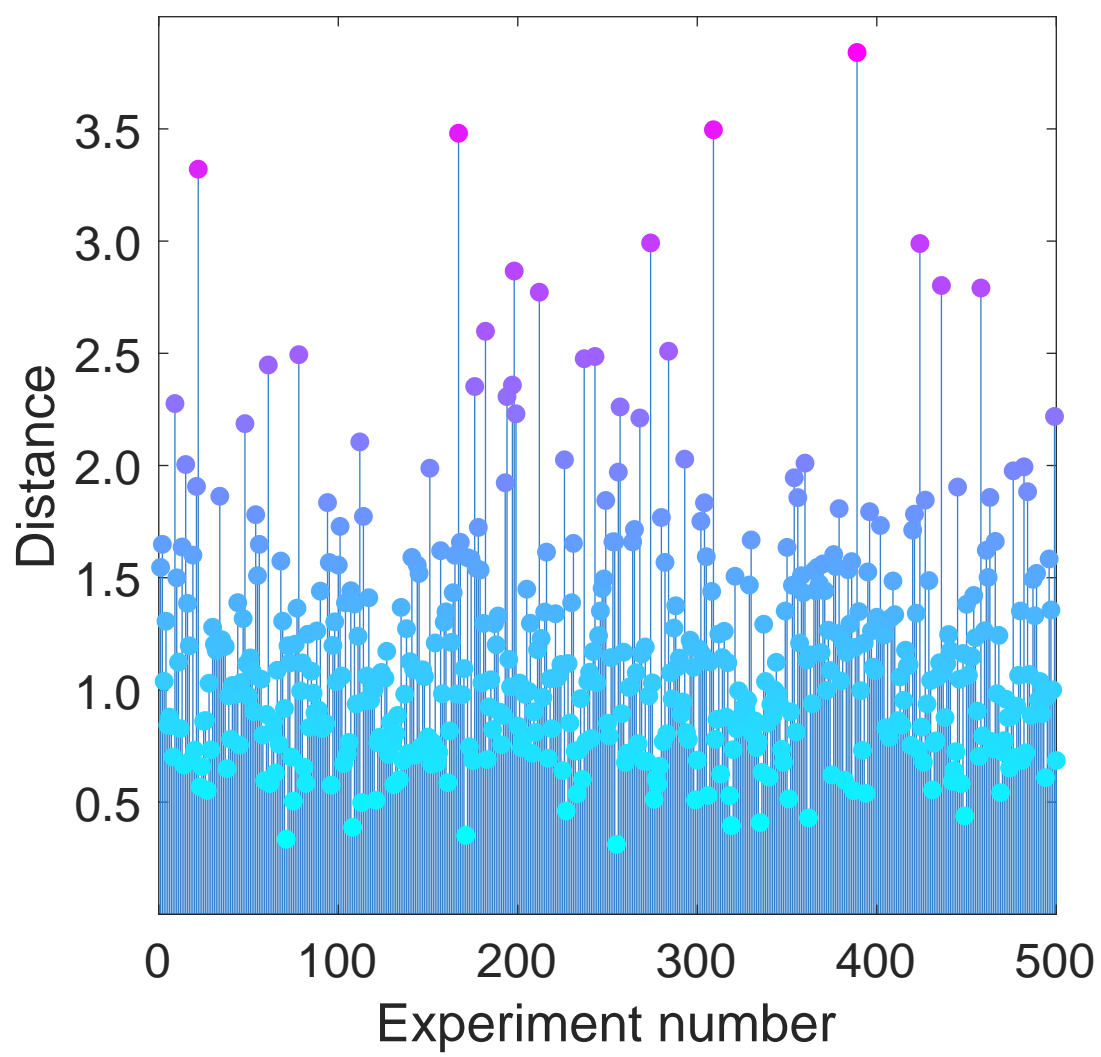

Supplement: ijoc.2025.1169.cd.zip [file fig3_a.pdf › 2025.1169-main/results/fig3_a.pdf]

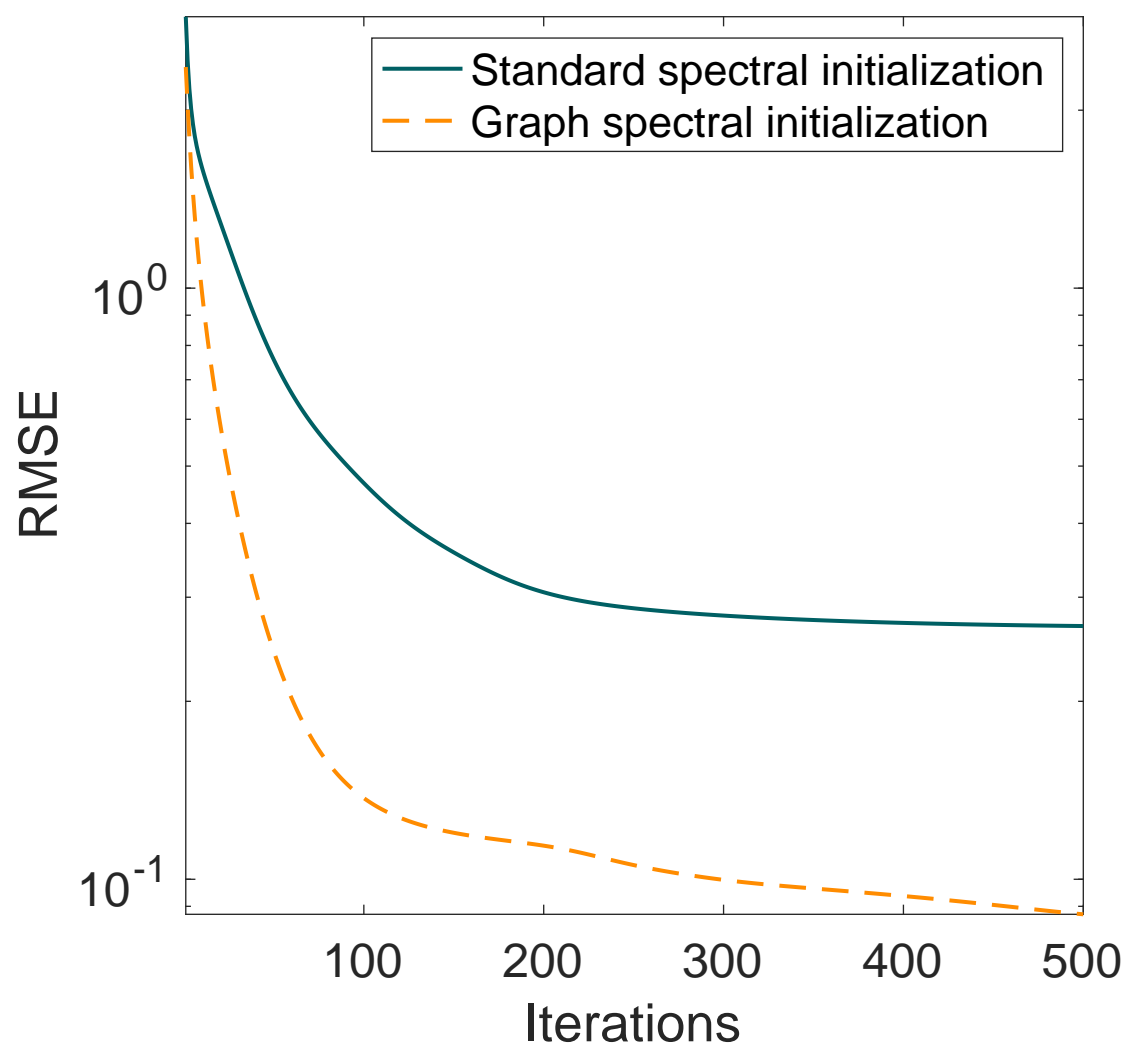

Supplement: ijoc.2025.1169.cd.zip [file fig3_b.pdf › 2025.1169-main/results/fig3_b.pdf]

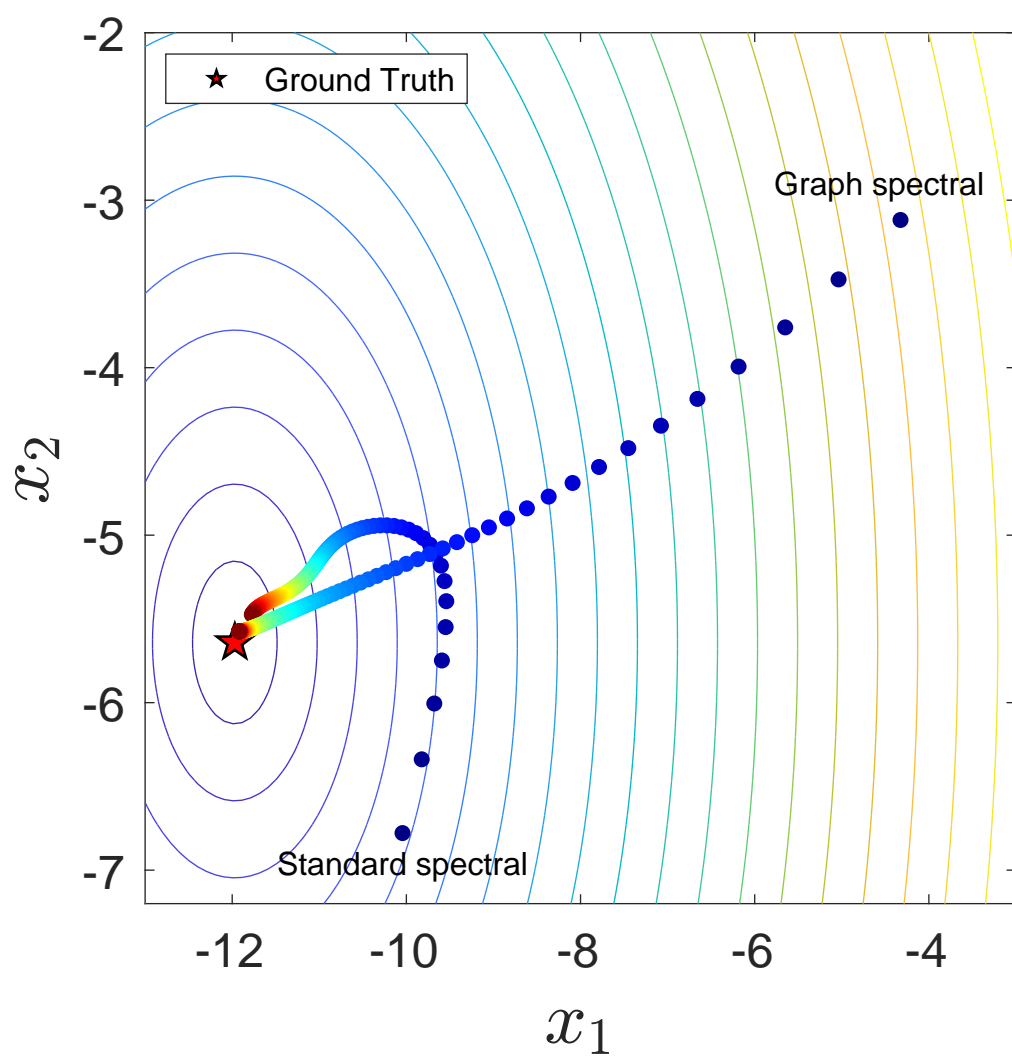

Supplement: ijoc.2025.1169.cd.zip [file fig3_c.pdf › 2025.1169-main/results/fig3_c.pdf]

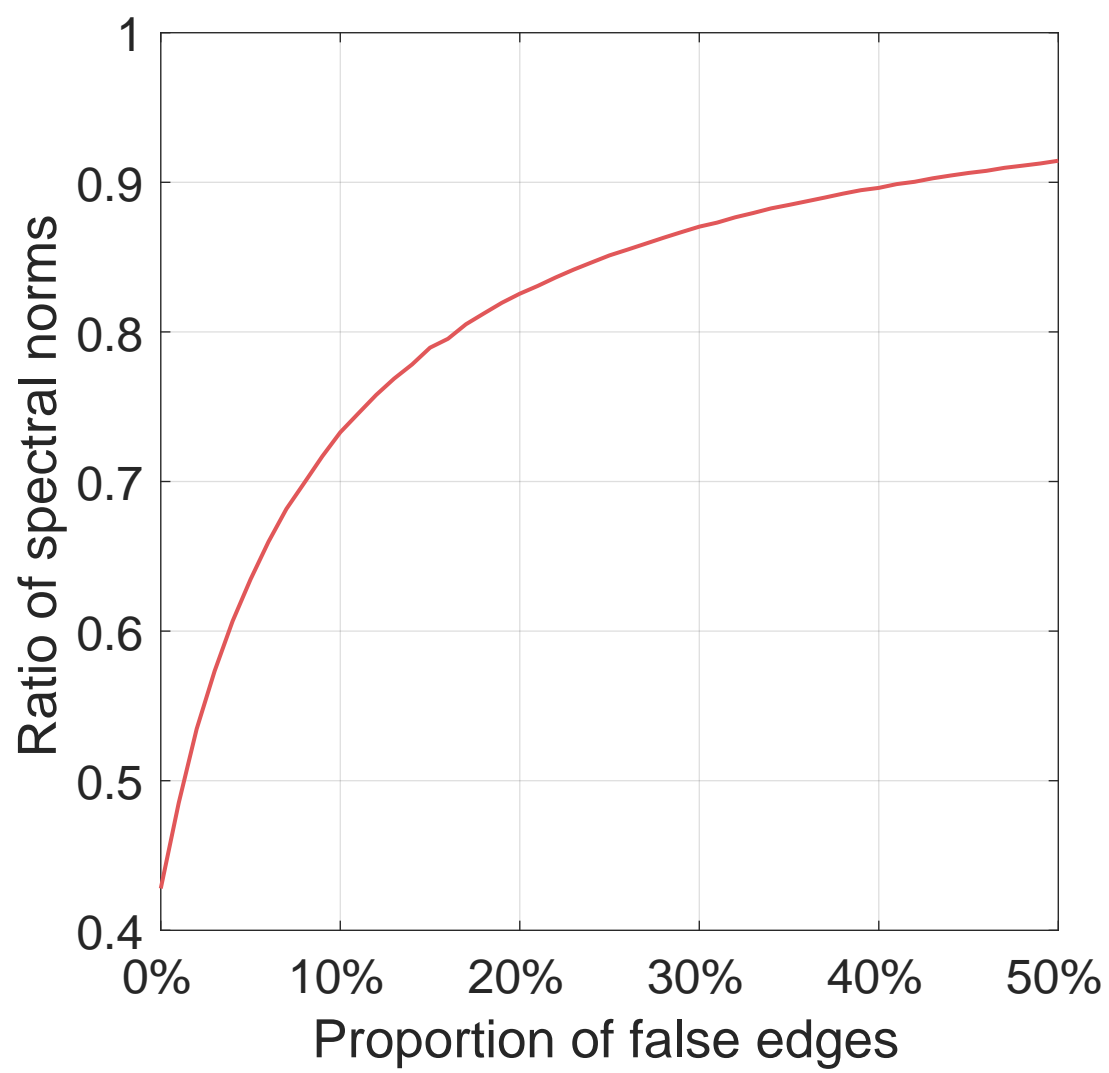

Supplement: ijoc.2025.1169.cd.zip [file fig3_d.pdf › 2025.1169-main/results/fig3_d.pdf]

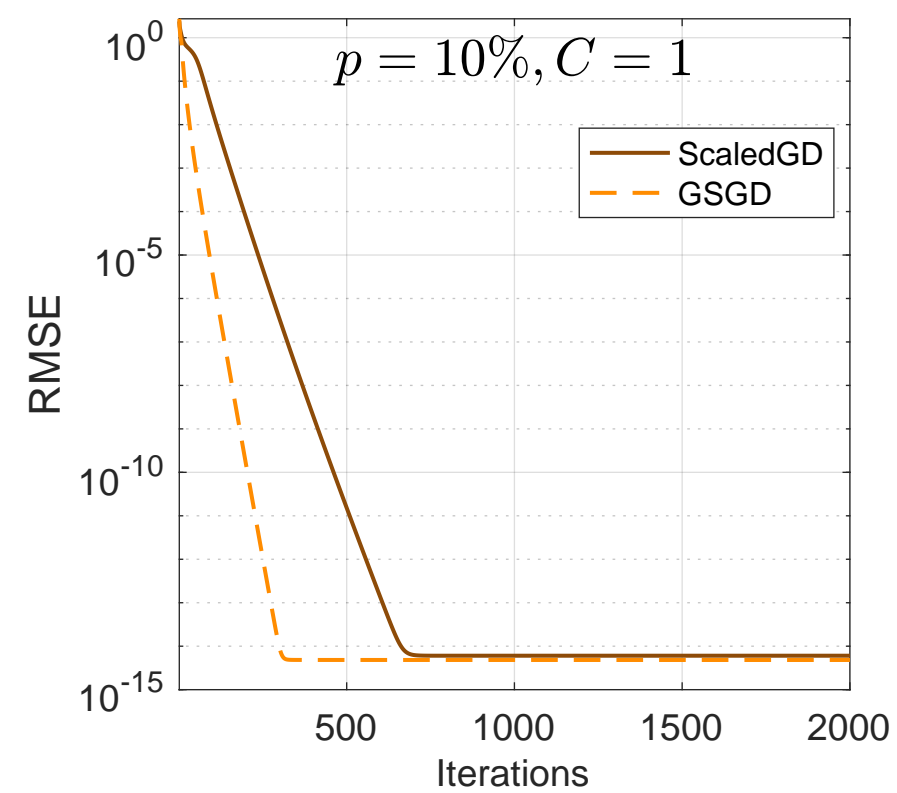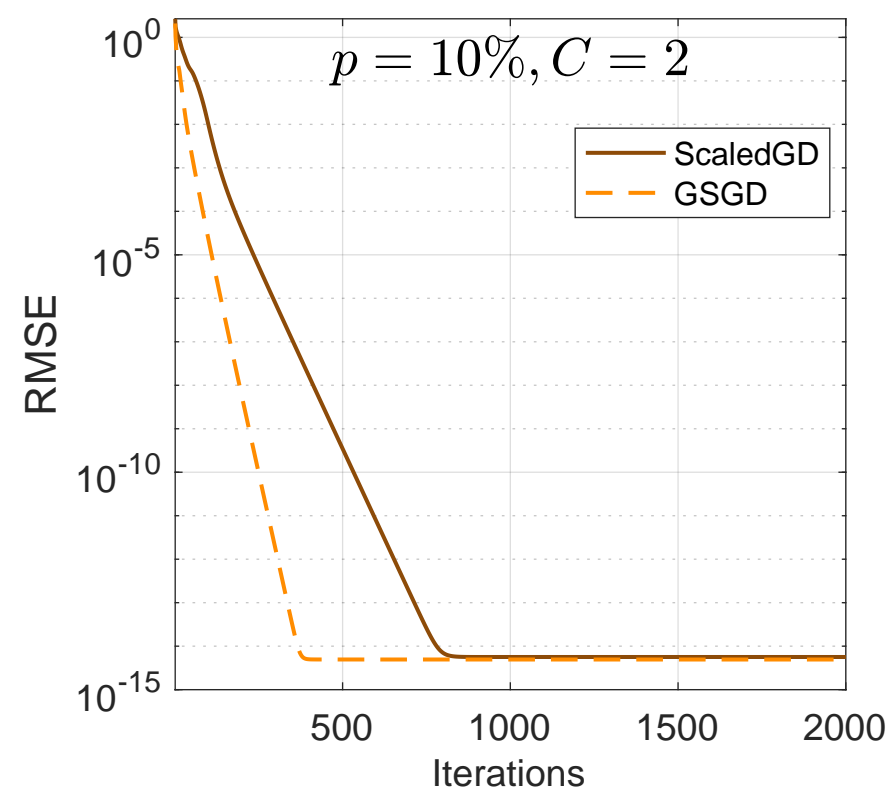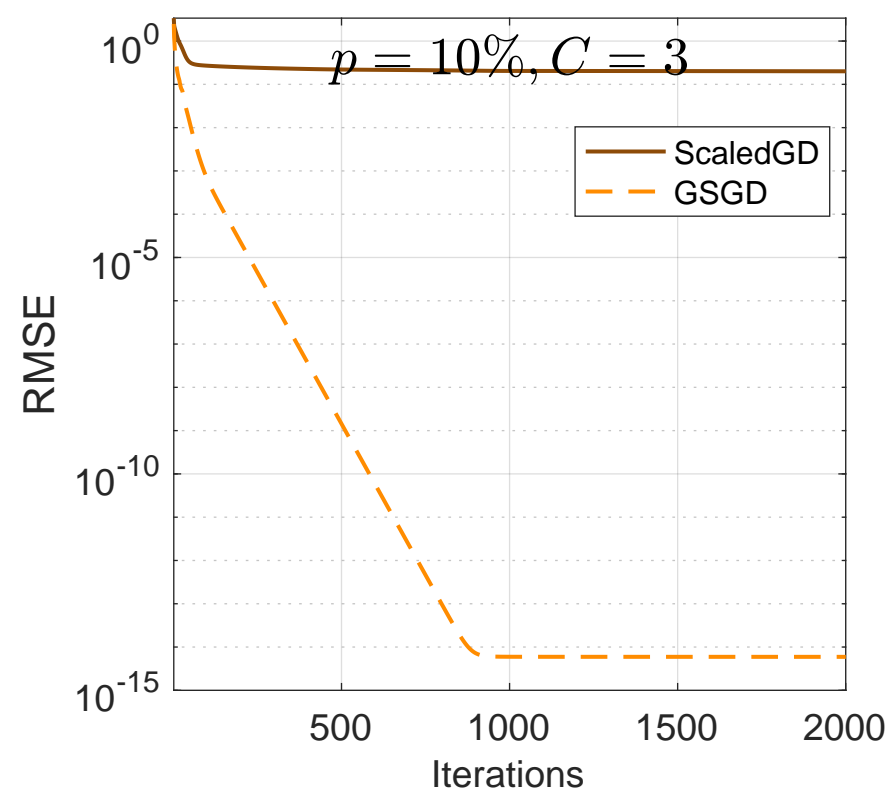

Supplement: ijoc.2025.1169.cd.zip [file fig4.pdf › 2025.1169-main/results/fig4.pdf]

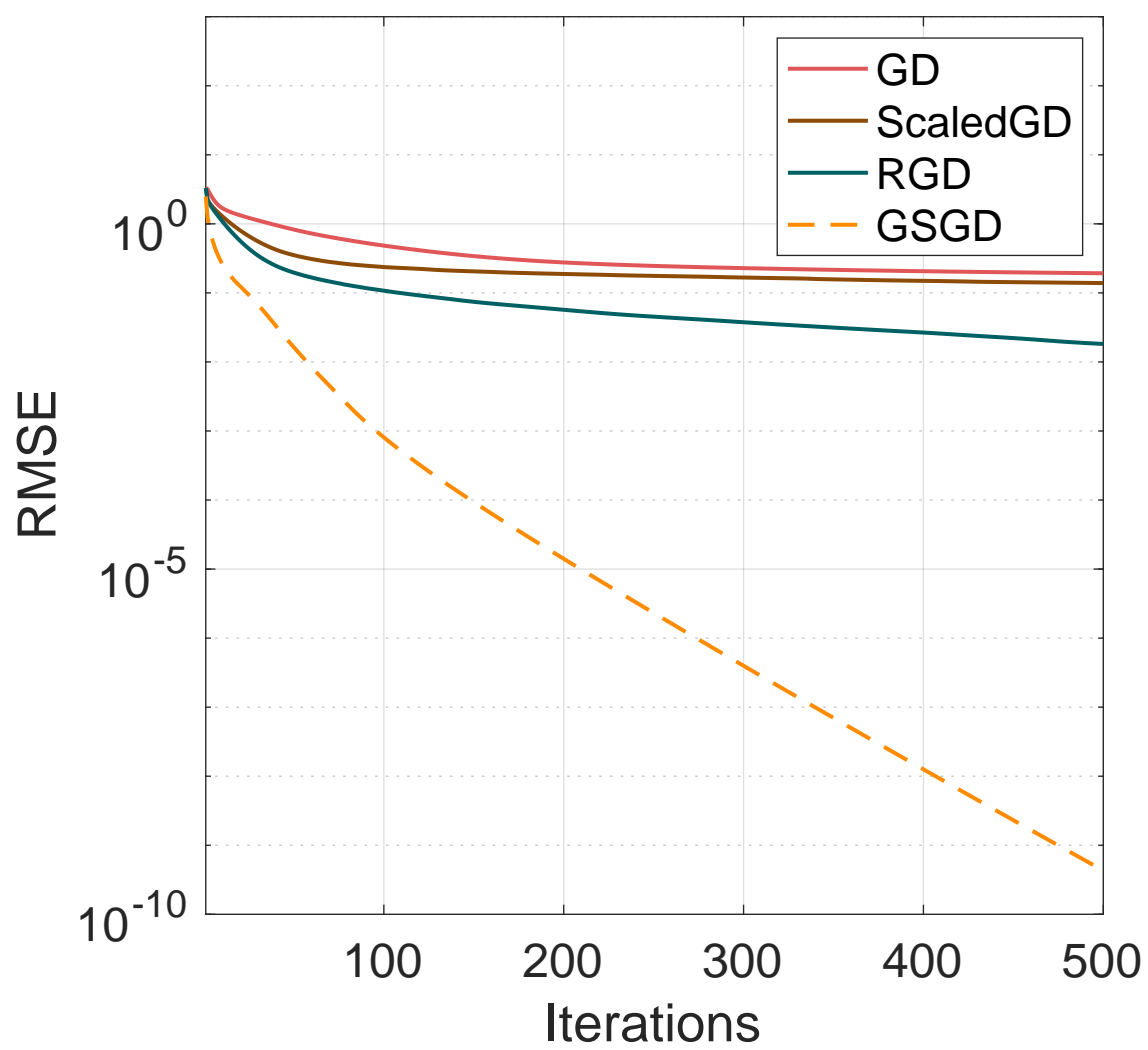

Supplement: ijoc.2025.1169.cd.zip [file fig5_a.pdf › 2025.1169-main/results/fig5_a.pdf]

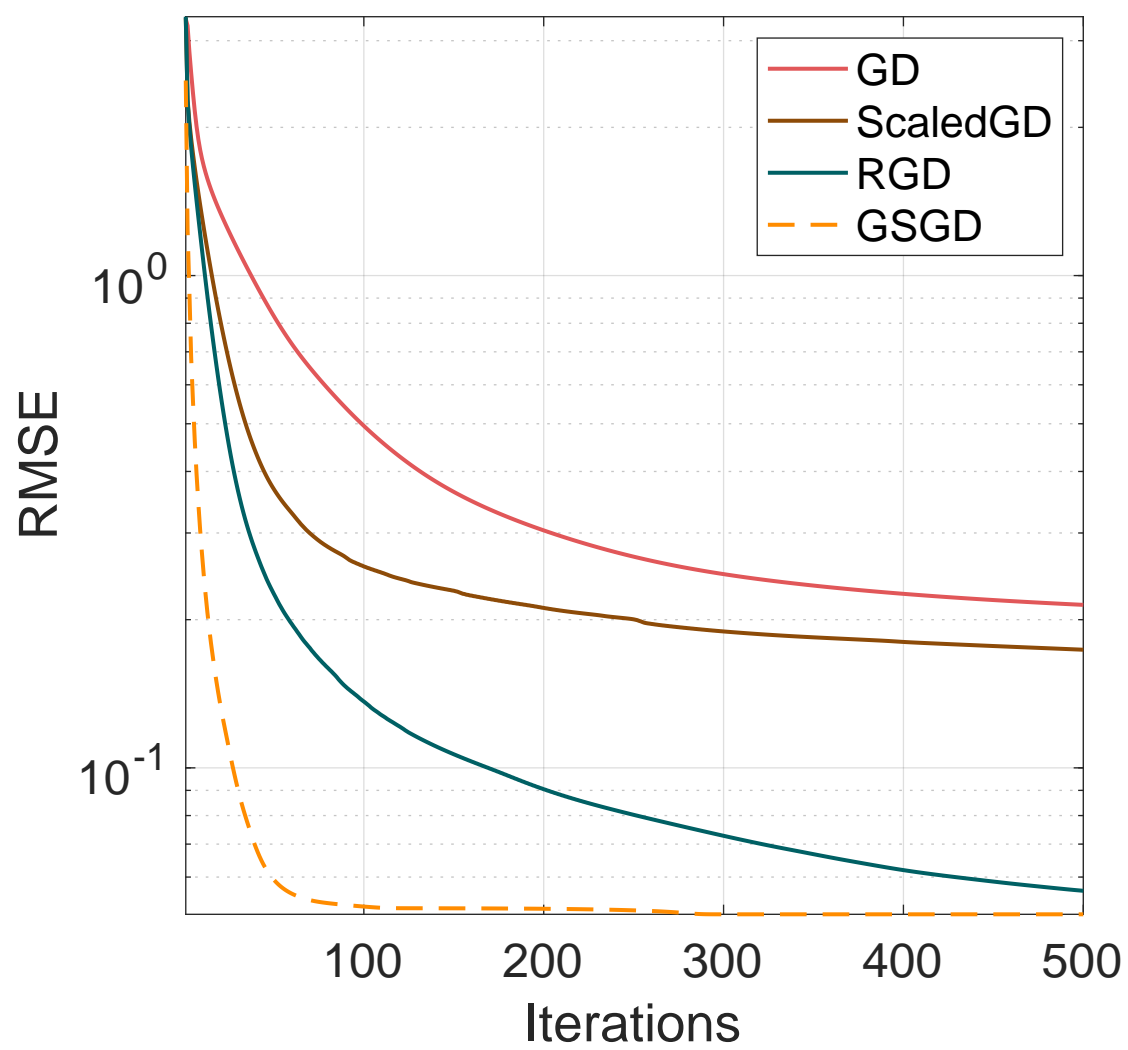

Supplement: ijoc.2025.1169.cd.zip [file fig5_b.pdf › 2025.1169-main/results/fig5_b.pdf]

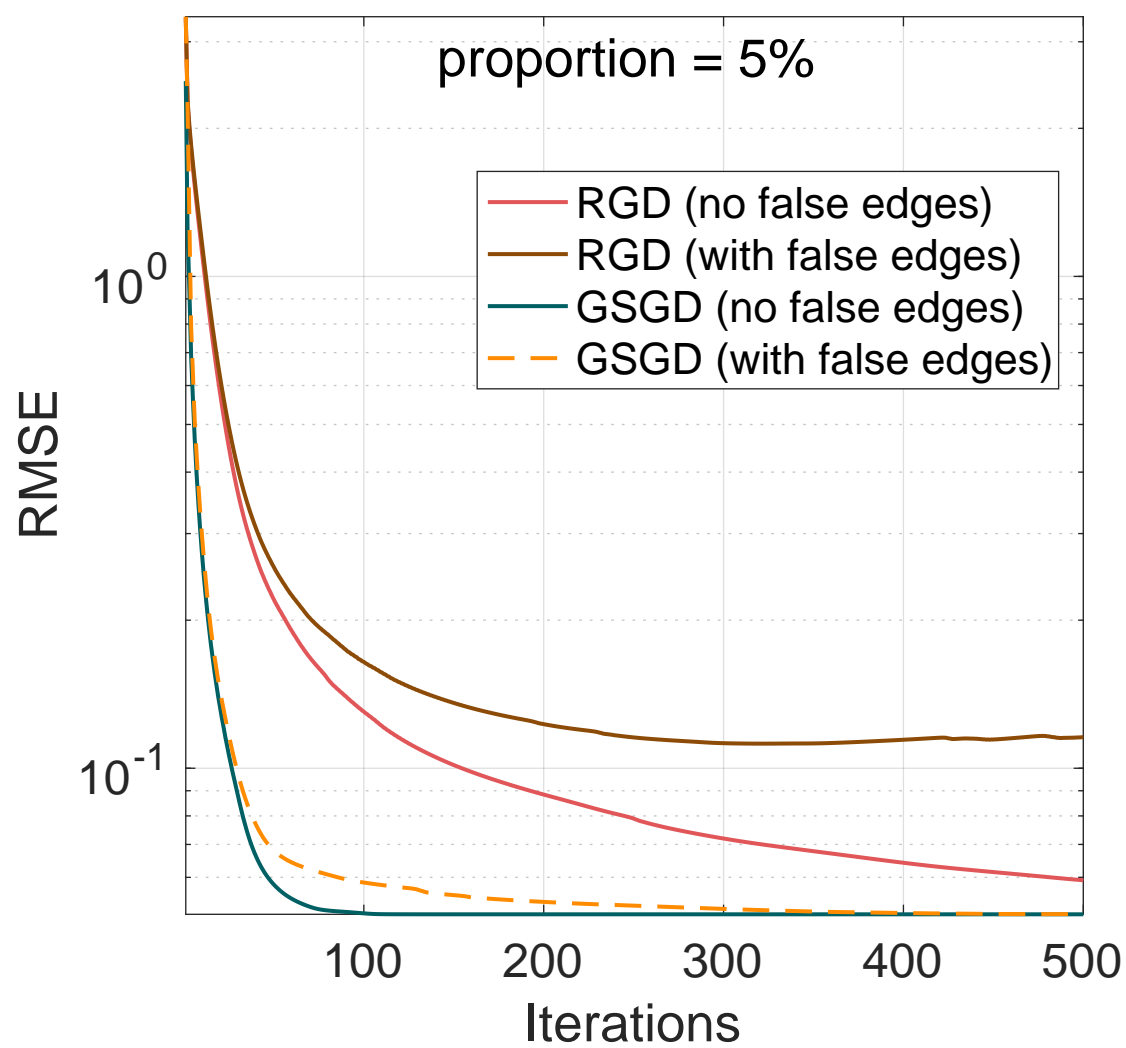

Supplement: ijoc.2025.1169.cd.zip [file fig5_c.pdf › 2025.1169-main/results/fig5_c.pdf]

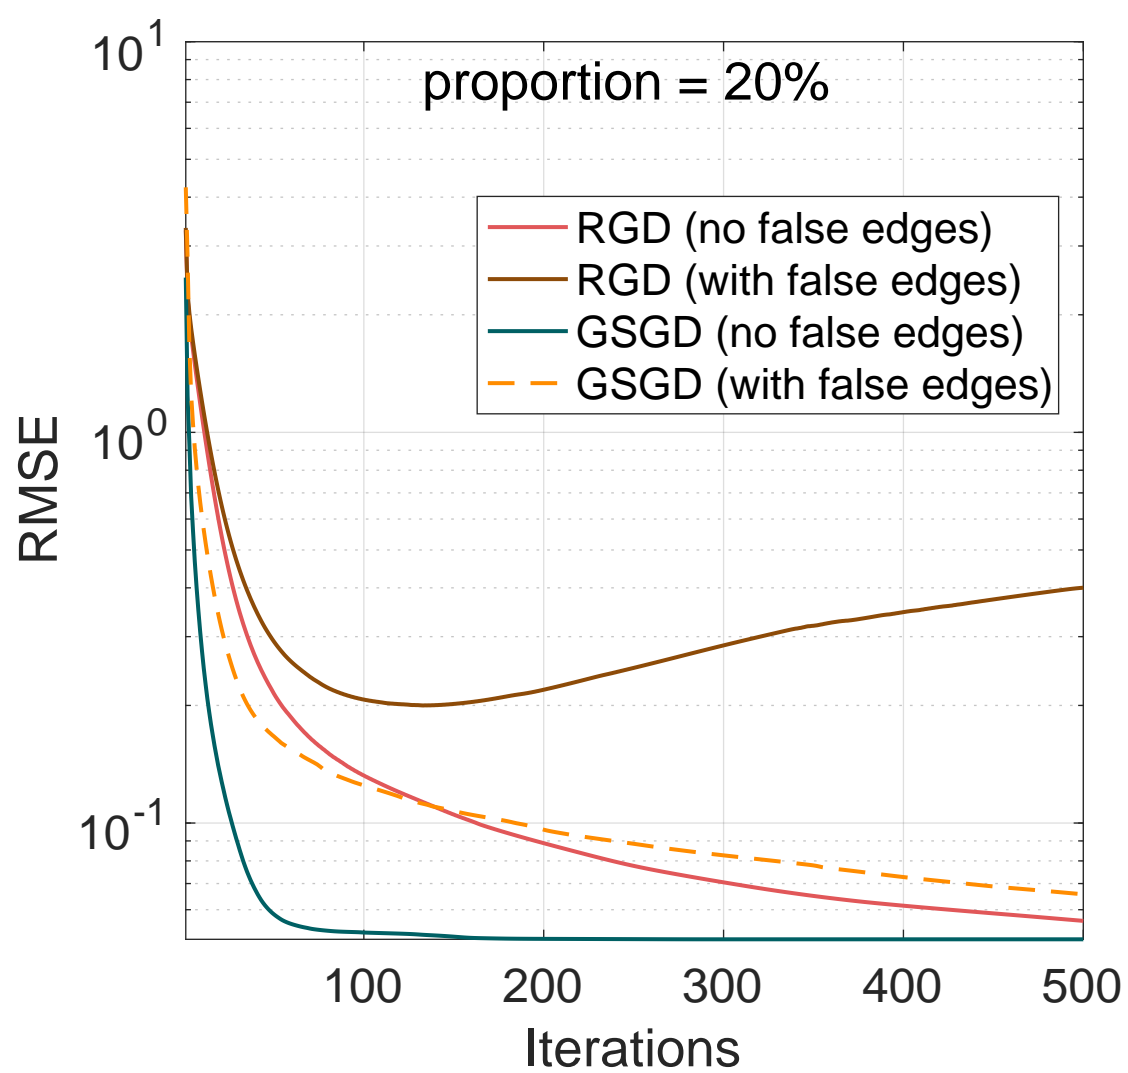

Supplement: ijoc.2025.1169.cd.zip [file fig5_d.pdf › 2025.1169-main/results/fig5_d.pdf]

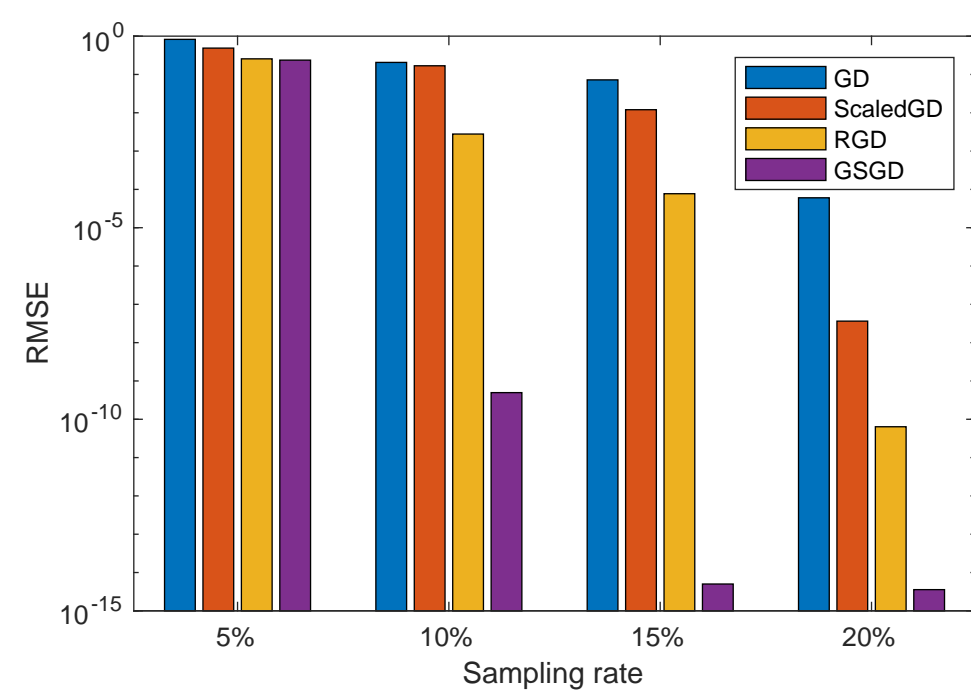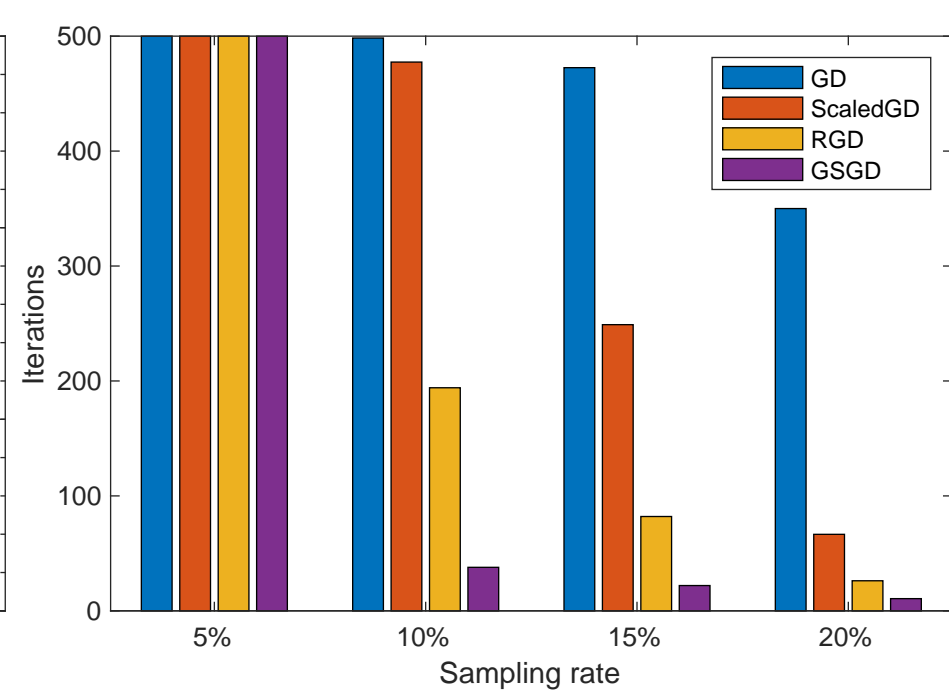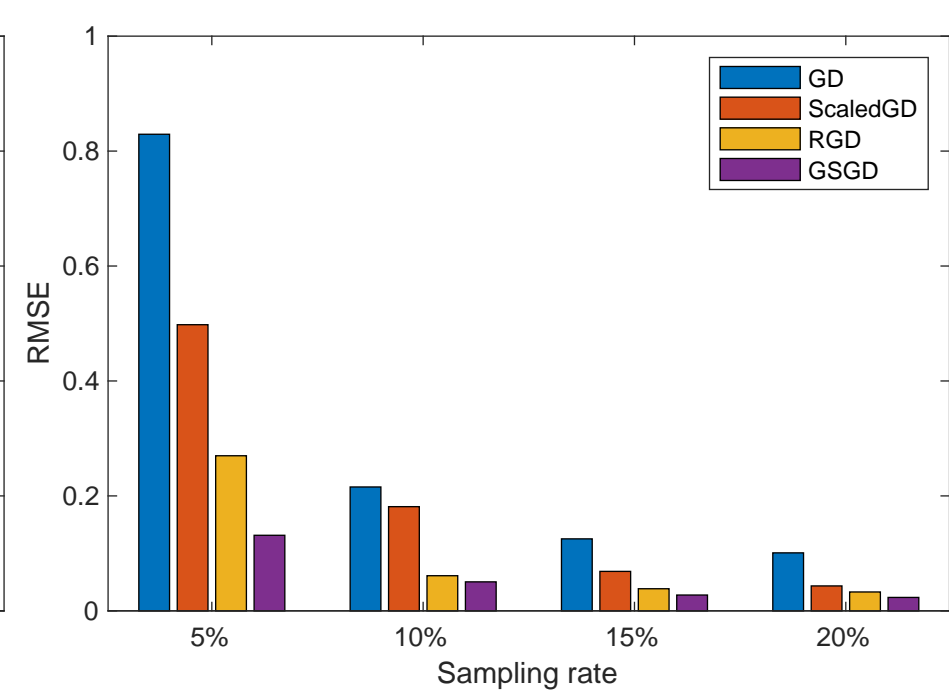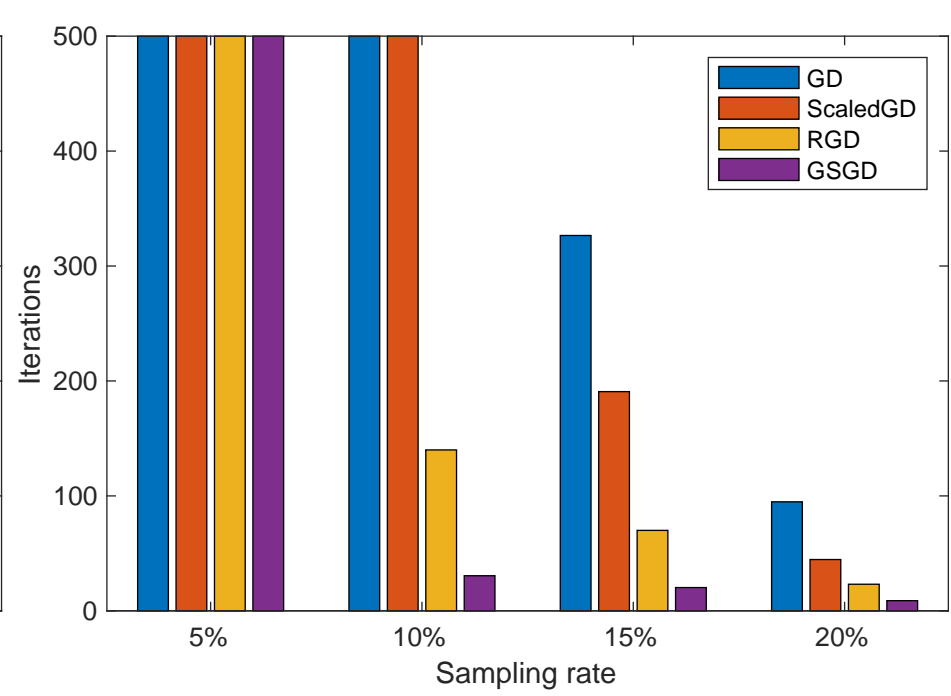

Supplement: ijoc.2025.1169.cd.zip [file fig6.pdf › 2025.1169-main/results/fig6.pdf]

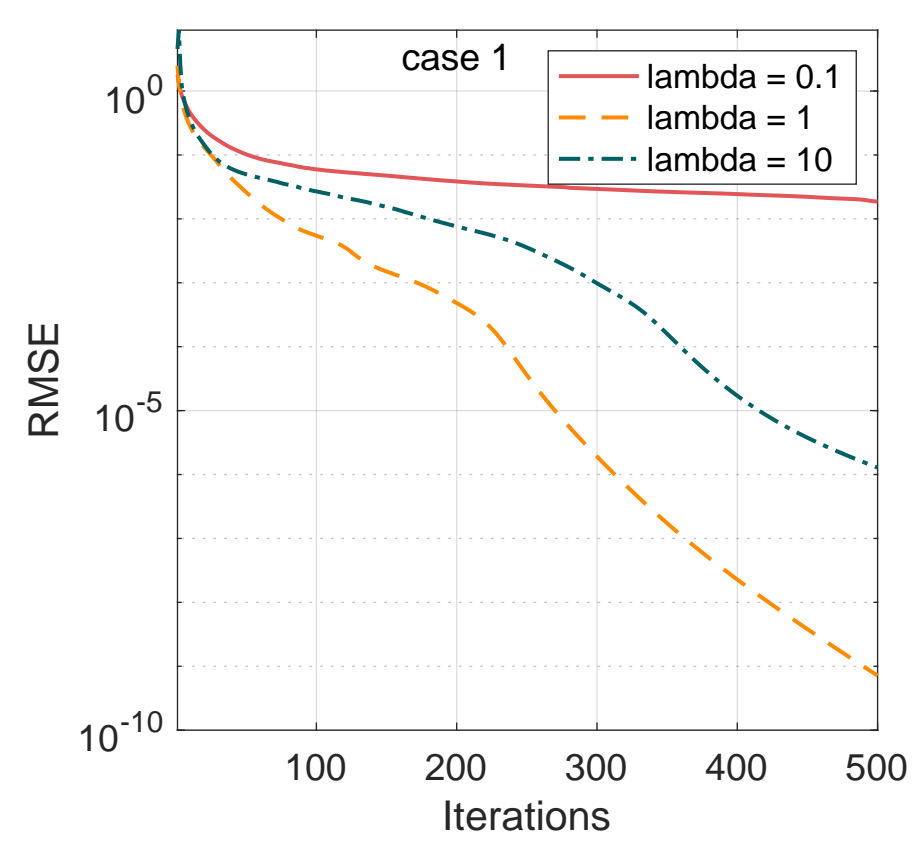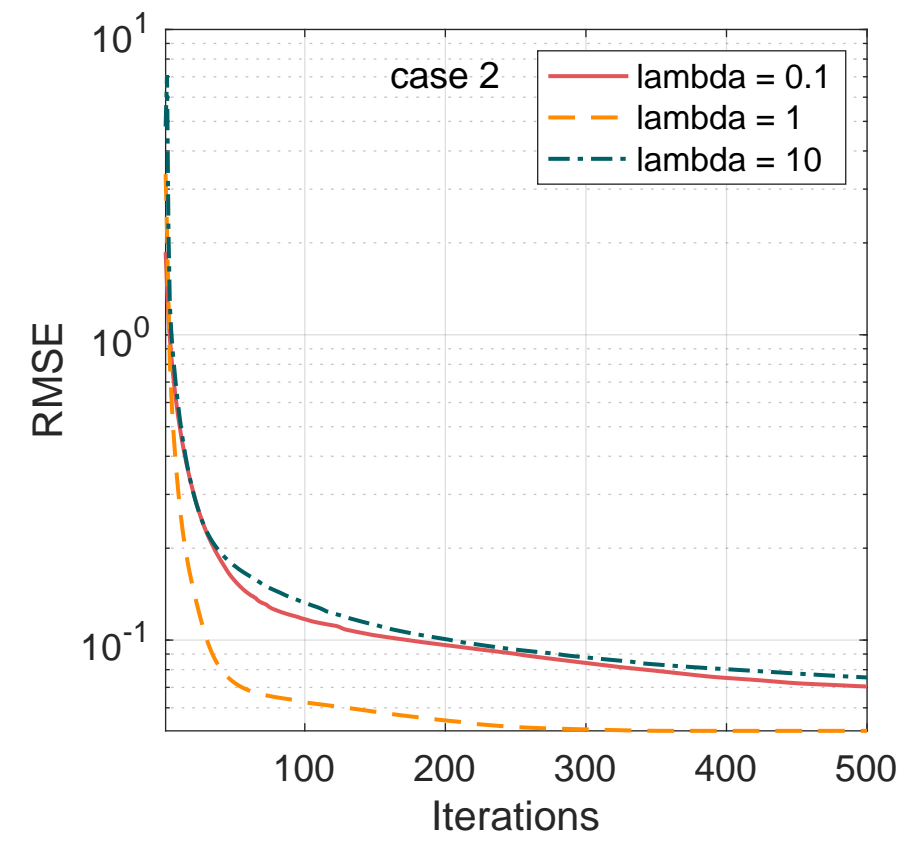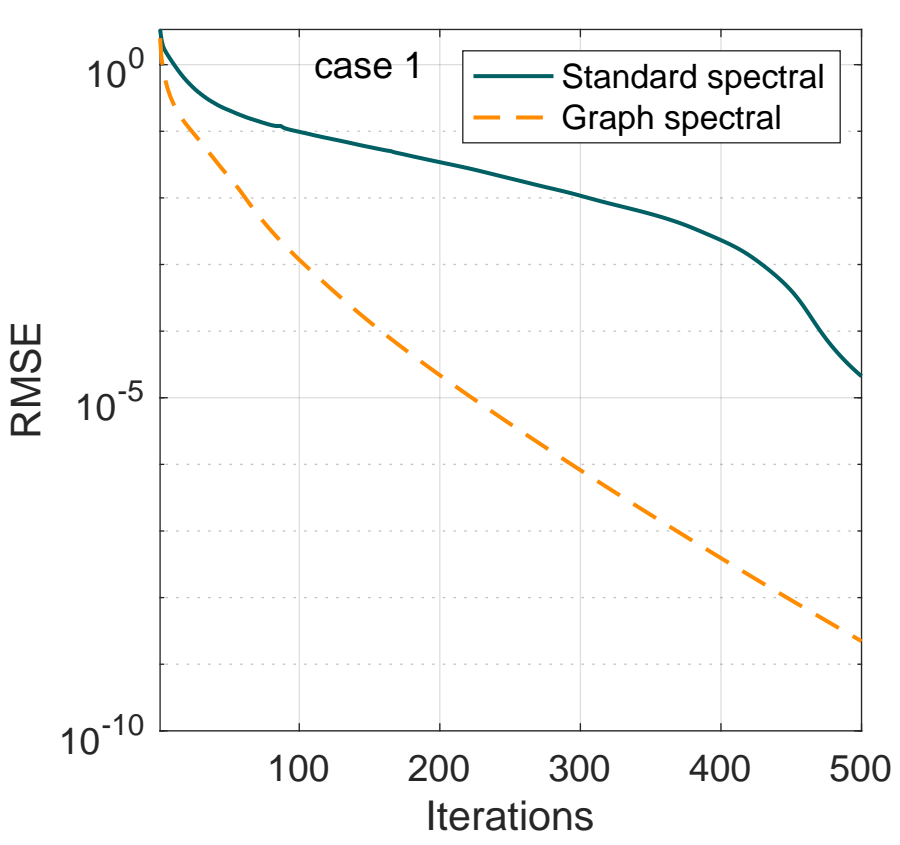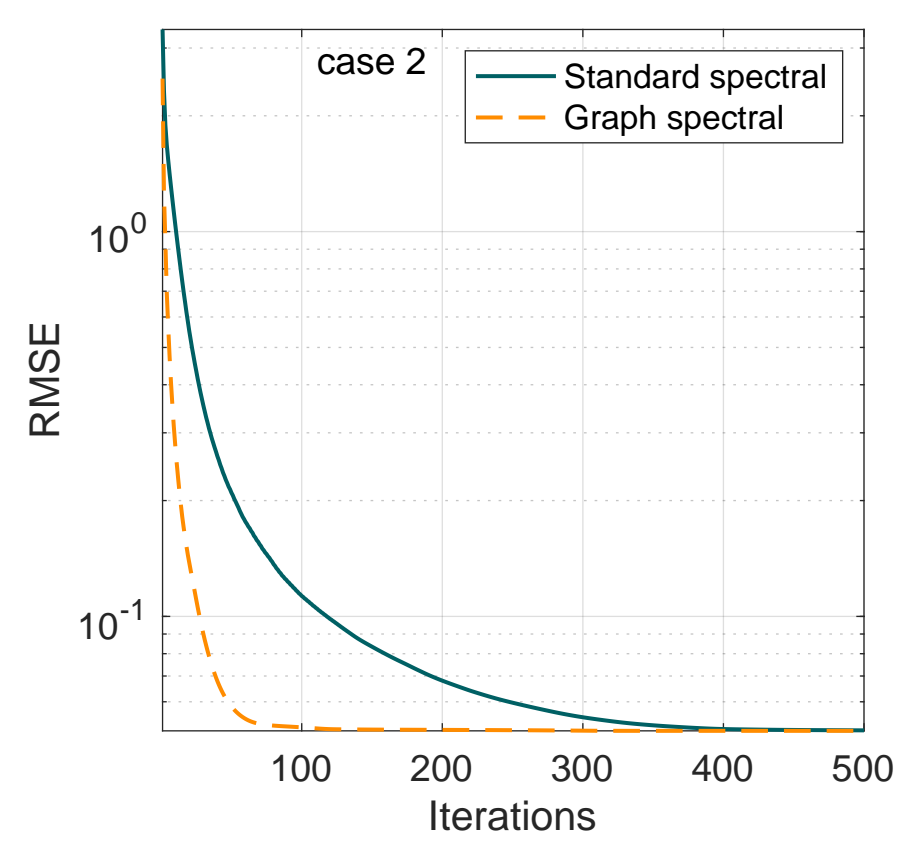

Supplement: ijoc.2025.1169.cd.zip [file fig7.pdf › 2025.1169-main/results/fig7.pdf]
